# Supplementary material for: Expression of androgen receptor splice variants in clinical breast cancers
Source: PubMed Central journal article supplement (PMC4792588; doi:10.18632/oncotarget.6296), 2015-11-05
Supplement: oncotarget-06-44728-s006.pdf [file oncotarget-06-44728-s006.pdf]

**Supplementary Table 5. No overlap between genes altered by AR-V7 over-expression in MDA-MB-453 cells versus LNCaP cells**

| <b>AR-V7-regulated genes in MDA-MB-453</b> | <b>AR-V7-regulated genes in LNCaP</b> | <b>Overlap</b> |
|--------------------------------------------|---------------------------------------|----------------|
| ADM                                        | BIRC5                                 | -              |
| AFAP1                                      | BUB1                                  |                |
| ANO1                                       | BUB1B                                 |                |
| C10orf12                                   | CCNA2                                 |                |
| C12orf63                                   | CDC258                                |                |
| C1QTNF6                                    | CDC25C                                |                |
| CCL22                                      | CDCA5                                 |                |
| CCL5                                       | CENPE                                 |                |
| CCRN4L                                     | CIT                                   |                |
| CD300C                                     | ESPL1                                 |                |
| CSAG2                                      | KIF15                                 |                |
| CXCL10                                     | KIF22                                 |                |
| CXCL11                                     | KIF2C                                 |                |
| CYTB                                       | KNTC1                                 |                |
| DLG4                                       | KPNA2                                 |                |
| DUSP16                                     | MAD2L1                                |                |
| EDN1                                       | MAD2L2                                |                |
| EPGN                                       | NEK2                                  |                |
| FAM65B                                     | NUSAP1                                |                |
| GCNT2                                      | PKMYT1                                |                |
| GDF15                                      | PLK1                                  |                |
| GULP1                                      | TPX2                                  |                |
| HIST1H2BM                                  | UBE2C                                 |                |
| HIST2H2BA                                  | ZWINT                                 |                |
| HLA-G                                      |                                       |                |
| IFI16                                      |                                       |                |
| IFITM3                                     |                                       |                |
| IFNB1                                      |                                       |                |
| IGHV3-53                                   |                                       |                |
| IGHV4-31                                   |                                       |                |
| IL11RA                                     |                                       |                |
| IL28A                                      |                                       |                |
| IL28B                                      |                                       |                |
| IL29                                       |                                       |                |
| IL8                                        |                                       |                |
| KLHDC7B                                    |                                       |                |
| KLRAQ1                                     |                                       |                |
| LIF                                        |                                       |                |
| LRP2                                       |                                       |                |
| MAP3K8                                     |                                       |                |
| MBTPS2                                     |                                       |                |
| MMP13                                      |                                       |                |
| NCF2                                       |                                       |                |
| NR4A2                                      |                                       |                |
| NTN4                                       |                                       |                |
| OASL                                       |                                       |                |
| PAPSS2                                     |                                       |                |
| PCGF5                                      |                                       |                |
| PMAIP1                                     |                                       |                |
| PPP1R15A                                   |                                       |                |
| PRDM2                                      |                                       |                |
| PRKDC                                      |                                       |                |
| PTHLH                                      |                                       |                |
| RARRES3                                    |                                       |                |

RND1  
RPS2  
RSAD2  
SESN2  
SLC25A28  
SLC7A11  
SLC9A3R1  
SNORA10  
SPINT1  
STC1  
TBC1D9  
TLR2  
TNFAIP3  
TNFRSF12A  
TNFRSF21  
TNFSF15  
UBA7  
WARS  
WFDC5  
XAF1  
ZC3HAV1
