# Supplementary material for: Expression of androgen receptor splice variants in clinical breast cancers
Source: PubMed Central journal article supplement (PMC4792588; doi:10.18632/oncotarget.6296), 2015-11-05
Supplement: oncotarget-06-44728-s008.pdf [file oncotarget-06-44728-s008.pdf]

**Supplementary Table 7. Overlap between genes altered by AR-V7 over-expression in MDA-MB-453 cells and an MCF7 ER-alpha-driven transcriptome**

| <b>AR-V7-regulated genes in MDA-MB-453</b> | <b>ER-regulated genes in MCF7, 6h (Duttre et al)</b> | <b>Overlap</b> |
|--------------------------------------------|------------------------------------------------------|----------------|
| ADM                                        | ABCC5                                                | C1QTNF6        |
| AFAP1                                      | ABCE1                                                | RND1           |
| ANO1                                       | ABHD2                                                | SLC9A3R1       |
| C10orf12                                   | ACAA2                                                |                |
| C12orf63                                   | ADCY9                                                |                |
| C1QTNF6                                    | AHNAK2                                               |                |
| CCL22                                      | AIM1                                                 |                |
| CCL5                                       | AKAP1                                                |                |
| CCRN4L                                     | ALCAM                                                |                |
| CD300C                                     | ALDH3A2                                              |                |
| CSAG2                                      | AMD1                                                 |                |
| CXCL10                                     | AMZ1                                                 |                |
| CXCL11                                     | ANKH                                                 |                |
| CYTB                                       | ANXA9                                                |                |
| DLG4                                       | AP1B1                                                |                |
| DUSP16                                     | AREG                                                 |                |
| EDN1                                       | ARID5B                                               |                |
| EPGN                                       | ARL3                                                 |                |
| FAM65B                                     | ASB13                                                |                |
| GCNT2                                      | ATP11A                                               |                |
| GDF15                                      | ATP6V0A4                                             |                |
| GULP1                                      | ATP6V1C2                                             |                |
| HIST1H2BM                                  | B3GALNT1                                             |                |
| HIST2H2BA                                  | BAK1                                                 |                |
| HLA-G                                      | BCL2                                                 |                |
| IFI16                                      | BCS1L                                                |                |
| IFITM3                                     | BLNK                                                 |                |
| IFNB1                                      | BLVRB                                                |                |
| IGHV3-53                                   | BMF                                                  |                |
| IGHV4-31                                   | BRCA1                                                |                |
| IL11RA                                     | BRI3BP                                               |                |
| IL28A                                      | BRIP1                                                |                |
| IL28B                                      | C14orf182                                            |                |
| IL29                                       | C15orf42                                             |                |
| IL8                                        | C1QTNF6                                              |                |
| KLHDC7B                                    | C4orf43                                              |                |
| KLRAQ1                                     | C5orf41                                              |                |
| LIF                                        | C9orf95                                              |                |
| LRP2                                       | CA12                                                 |                |
| MAP3K8                                     | CALCR                                                |                |
| MBTPS2                                     | CCNE2                                                |                |
| MMP13                                      | CCNG2                                                |                |
| NCF2                                       | CD44                                                 |                |
| NR4A2                                      | CD82                                                 |                |
| NTN4                                       | CDC45                                                |                |
| OASL                                       | CDC6                                                 |                |
| PAPSS2                                     | CDCA7                                                |                |
| PCGF5                                      | CDK6                                                 |                |
| PMAIP1                                     | CDKL5                                                |                |
| PPP1R15A                                   | CDYL2                                                |                |
| PRDM2                                      | CELSR2                                               |                |
| PRKDC                                      | CHAF1A                                               |                |
| PTHLH                                      | CHEK1                                                |                |
| RARRES3                                    | CHRNA5                                               |                |

RND1  
RPS2  
RSAD2  
SESN2  
SLC25A28  
SLC7A11  
SLC9A3R1  
SNORA10  
SPINT1  
STC1  
TBC1D9  
TLR2  
TNFAIP3  
TNFRSF12A  
TNFRSF21  
TNFSF15  
UBA7  
WARS  
WFDC5  
XAF1  
ZC3HAV1

CLEC2D  
CNKSR3  
COL12A1  
CRISPLD2  
CTNND2  
CTPS  
CXCL12  
CXorf27  
DDX10  
DDX21  
DEPTOR  
DKC1  
DNAJC12  
DNAJC15  
DPM2  
DRAM1  
DSCC1  
DTL  
E2F1  
ECE2  
EFEMP1  
EFHD1  
EFNA1  
EGLN3  
EGR3  
ELF1  
ELOVL2  
ENDOD1  
EPAS1  
EPB41L5  
ERBB2  
ERBB4  
EXO1  
EXOSC5  
FAM102A  
FAM171B  
FAM84A  
FARP1  
FEN1  
FGF13  
FKBP4  
FKBP5  
FLNB  
FRK  
GAB2  
GALNT10  
GART  
GINS2  
GINS3  
GLA  
GRB14  
GRB7  
GREB1  
GRHL3  
HCAR1  
HELLS  
HEY2  
HIF1A  
HPS3

HR  
HSD17B11  
HSPB8  
HSPD1  
IFNAR2  
IGFBP4  
IL17RB  
IL1R1  
INPP5J  
IRF6  
ISG20  
ISOC1  
ITGB6  
JAK2  
KAT2B  
KCNK5  
KCNK6  
KIAA0513  
KIF21A  
KLHL24  
KRT13  
KYNU  
LDLRAD3  
LIMA1  
LIPH  
LMO7  
LOC442075  
LONRF2  
LRIG1  
LRP8  
LRRFIP2  
LYAR  
MACF1  
MAMLD1  
MAPT  
MARS  
MBOAT1  
MCM10  
MCM2  
MCM3  
MCM4  
MCM5  
MCM6  
MCM7  
MCM8  
MICAL2  
MLF1IP  
MME  
MMP16  
MMS22L  
MOCOS  
MRPS23  
MTAP  
MTHFD1L  
MYB  
MYBBP1A  
MYBL1  
MYC  
MYO1B

MYOF  
N4BP3  
NAB2  
NAV2  
NBEA  
NEDD4L  
NIP7  
NOL6  
NOLC1  
NOP2  
NOP56  
NOS1AP  
NPHP3  
NPNT  
NPY1R  
NR2C2AP  
NR3C1  
NRIP1  
NT5DC3  
NUAK1  
NXNL2  
OLFM1  
OLFML3  
OPN3  
OSTF1  
PAICS  
PARP9  
PAX9  
PCNA  
PCP4  
PDCD11  
PEX11A  
PGR  
PHLDA1  
PIGW  
PKIB  
PLA2G16  
PLA2R1  
PLAC1  
PLEKHF2  
PLEKHH1  
PLIN2  
PLOD2  
POLA2  
POLE2  
POLR1B  
PPAN  
PIIF  
PRIM1  
PRSS23  
PTGER4  
PTGES  
PXK  
RAB27B  
RAB31  
RAPGEFL1  
RARA  
RBBP8  
RBL1

RCAN1  
RERG  
RET  
RFC3  
RND1  
RNF144B  
RPL32  
RRP12  
RRS1  
RUVBL1  
S1PR3  
SALL4  
SCARB1  
SDK2  
SEC14L2  
SEH1L  
SEMA3B  
SEPT5  
SEPT9  
SESN3  
SFXN2  
SGCG  
SGK1  
SGK3  
SH3BP4  
SLC16A1  
SLC19A2  
SLC1A4  
SLC1A5  
SLC22A5  
SLC25A24  
SLC26A2  
SLC27A2  
SLC29A1  
SLC47A1  
SLC7A1  
SLC7A5  
SLC9A3R1  
SMOX  
SNX24  
SSBP2  
ST8SIA4  
STC2  
STON1  
SVIL  
SYBU  
SYTL4  
SYTL5  
TFAP4  
TFPI  
TGFB2  
TGFB3  
TGM2  
TIAM1  
TIPARP  
TMED8  
TMEM104  
TMEM120B  
TMEM164

TMEM194A  
TMEM45B  
TMEM64  
TMTC2  
TNS3  
TP53INP1  
TPBG  
TPD52L1  
TPM1  
TSPAN12  
UACA  
UGCG  
UHRF1  
UNG  
USP31  
UTRN  
WDHD1  
WDR3  
WDR4  
WDR46  
WDR76  
XRCC2  
XRCC3  
YARS  
YPEL3  
ZDHC7  
ZNF185  
ZNF367  
ZNF467  
ZNF704
